# Supplementary material
Source: publisher figshare collection journal article supplement (https://gsajournals.figshare.com/ndownloader/files/15177608)
Supplement: Supplementary file 1 [file 15177608]

# Assembled Genomic Scaffolds

---

## Files in this archive

---

List of file names and number of scaffolds in parentheses:

- Agri.genomic.scaffs.fasta (74,159)
- Agri.genomic.scaffs.RM.fasta (74,159)
- Agri.scaffs.to.LGs.csv (3,278)

## File Format

---

*Agri.genomic.scaffs.fasta:*

```
>[SCAFFOLD_ID] [LENGTH] [COVERAGE]  
SEQUENCE
```

where [SCAFFOLD\_ID] is the scaffold identification number assigned to the scaffold by [ABYSS](#), [LENGTH] is the length of the scaffold, and [COVERAGE] is the total k-mer coverage. The sequence headers are the ABYSS-generated scaffold names. For more information, check the ABYSS manual.

*Agri.genomic.scaffs.RM.fasta:*

```
>Agri_[SCAFFOLD_ID]  
SEQUENCE
```

where [SCAFFOLD\_ID] is the scaffold identification number assigned to the scaffold by [ABYSS](#), and the SEQUENCE is the hard-masked scaffold sequence. *NOTE:*

Agri.genomic.scaffs.RM.fasta is the hard-masker version of Agri.genomic.scaffs.fasta (i.e., all repetitive regions have been replaced with N 's')

*Agri.scaffs.to.LGs.csv:*

The file are in comma-separated values (CSV) format with two columns:

1. the ABySS-assigned scaffold ID (scaff)
2. linkage group (LG)

# Genome Annotation

---

## Files in this archive

---

- *Agri.gene.models.only.gff* (15,848 genes)
- *Agri.gene.models.evidence.bombyx\_func.gff* (2,657,992 lines)
- *Agri.predicted.proteins.bombyx\_func.fasta* (15,848 sequences)
- *Agri.predicted.transcripts.bombyx\_func.fasta* (15,848 sequences)

## File Format

---

*Agri.gene.models.only.gff:*

This file is a standard GFF format as generated by [MAKER2](#) accessory scripts.

*Agri.gene.models.evidence.bombyx\_func.gff:*

This file is a standard GFF format as generated by [MAKER2](#) accessory scripts. In addition, functional annotation information based on *Bombyx mori* proteins from [UniProt](#) is included in the 'Note' field.

*Agri.predicted.transcripts.bombyx\_func.fasta* & *Agri.predicted.proteins.bombyx\_func.fasta:*

The two files are in FASTA format. The sequence names were generated by [MAKER2](#).

# Phenotypes and Consensus, Linkage Group-specific Markers

---

## Files in this archive

---

List of file names and the table dimensions in (rows x columns) format:

- Agri.FL-BC.consensus.geno.matrix.csv (468 x 38)
- Agri.KS-BC.consensus.geno.matrix.csv (450 x 38)
- Agri.KS-SG.consensus.geno.matrix.csv (201 x 38)

These consensus genotype matrices were generated by collapsing all genotyping data for each individual for each linkage group to a single, consensus genotype. The (original) genotyping data are under `genotype_matrices` (for details, see "Materials and Methods").

## File Format

---

The files are in R/qtl format: the columns contain phenotypes and marker information, and the rows contain linkage group (LG), marker position, and individual information.

### *ROWS*

The first 3 rows in each file contain similar information:

- Row 1: phenotype names and marker names
- Row 2: empty in phenotype columns, and LG information in the columns containing the markers (M1-M30, one for each LG)
- Row 3: empty in phenotype columns, and marker position for each marker (in this case, 0)

Additionally,

- In the FL-BC file, rows 4 through 468 correspond to the 465 recombinant individuals in the FL-BC population.
- In the RK-BC file, rows 4 through 450 correspond to the 447 recombinant individuals in the KS-BC population.
- In the KS-SG file, rows 4 through 201 correspond to the 198 recombinant individuals in the KS-SG population.

# *COLUMNS*

All files contain 8 phenotype columns:

1. individual ID (ind)
2. family ID (family)
3. collection date (year)
4. developmental time (devTime)
5. weight at eclosion (weight)
6. pulse-pair rate (pr)
7. peak amplitude (pa)
8. asynchrony interval (ai)
9. The FL-BC file contains an additional 30 columns corresponding to a single consensus marker for each of the 30 LGs, with M1 being homologous to the Z chromosome.
10. The KS-BC file contains an additional 30 columns corresponding to a single consensus marker for each of the 30 LGs, with M1 being homologous to the Z chromosome.
11. The KS-BC file contains an additional 30 columns corresponding to a single consensus marker for each of the 30 LGs, with M1 being homologous to the Z chromosome.

# Assembled Transcripts

---

## Files in this archive

---

List of file names and number of sequences in parentheses:

- Agri.transcripts.fasta (96,420)

## File Format

---

*Agri.transcripts.fasta:*

```
>[TRANSCRIPT_ID]  
SEQUENCE
```

where [TRANSCRIPT\_ID] is the transcript identification assigned to the sequence by [Trinity](#).  
For more information, check the [Trinity output user guide](#).

# Marker Sequences and Marker-to-Linkage Group Tables

---

## 1. Marker Sequence Files

---

List of file names along with the number of sequences in parentheses:

- Agri.FL-BC.marker.sequences.fasta (5,721)
- Agri.KS-BC.marker.sequences.fasta (8,091)
- Agri.KS-SG.marker.sequences.fasta (12,801)

## File Format

---

The files are in FASTA format:

```
>[POPULATION]_[MARKER]  
SEQUENCE
```

where [POPULATION] corresponds to one of FL-BC, KS-BC, KS-SG, and [MARKER] corresponds to the marker ID.

## 2. Markers-to-LG Tables

---

List of file names along with the number of sequences in parentheses:

- Agri.FL-BC.marker2LG.csv (5,721)
- Agri.KS-BC.marker2LG.csv (8,091)
- Agri.KS-SG.marker2LG.csv (12,801)

## File Format

---

The tables contain information linking marker IDs to linkage groups in 3 columns:

1. marker ID (marker)

2. linkage group (LG)
3. position along the LG (position)



# Genotype Matrices (genotypes for all markers associated with linkage groups)

---

## Files in this archive

---

List of file names and the table dimensions in (rows x columns) format:

- Agri.FL-BC.genotype.matrix.csv (468 x 5,729)
- Agri.KS-BC.genotype.matrix.csv (450 x 8,099)
- Agri.KS-SG.genotype.matrix.csv (201 x 12,809)

## File Format

---

The files are in R/qtl format: the columns contain phenotypes and marker information, and the rows contain linkage group (LG), marker position, and individual information.

## *ROWS*

The first 3 rows in each file contain similar information:

- Row 1: phenotype names and marker names
- Row 2: empty in phenotype columns, and LG information in the columns containing the markers
- Row 3: empty in phenotype columns, and marker position along the LG in the columns containing the markers
  - *NOTE:* in the KS-SG file, the marker positions are simple placeholders since the markers in the segregant population could not be ordered.

Additionally,

- In the FL-BC file, rows 4 through 468 correspond to the 465 recombinant individuals in the FL-BC population.
- In the RK-BC file, rows 4 through 450 correspond to the 447 recombinant individuals in the KS-BC population.

- In the KS-SG file, rows 4 through 201 correspond to the 198 recombinant individuals in the KS-SG population.

## COLUMNS

All files contain 8 phenotype columns:

1. individual ID (ind)
2. family ID (family)
3. collection date (year)
4. developmental time (devTime)
5. weight at eclosion (weight)
6. pulse-pair rate (pr)
7. peak amplitude (pa)
8. asynchrony interval (ai)

Additionally,

- The FL-BC file contains 5,721 columns corresponding to as many genetic markers across 30 LGs.
- The KS-BC file contains 8,091 columns corresponding to as many genetic markers across 30 LGs.
- The KS-SG file contains 8,091 columns corresponding to as many genetic markers across 30 LGs.

## GENOTYPES

In the FL-BC file, the following genotypes appear:

- *aa*: homozygous for *FL* allele (*FL/FL*)
- *ab*: heterozygous (*FL/KS*)

In the KS-BC file, the following genotypes appear:

- *aa*: homozygous for *KS* allele (*KS/KS*)
- *ab*: heterozygous (*KS/FL*)

In the KS-SG file, the following genotypes appear:

- *aa*: homozygous for *KS* allele (*KS/KS*)
- *ab*: heterozygous (*KS/FL*)

# Generate Marker Catalog (interrogate.cstacks.catalog.2.py)

---

Interpreter: Python 2

## Command Line Use

---

```
python interrogate.cstacks.catalog.2.py PREFIX_A PREFIX_B
```

## Inputs

---

- `PREFIX_A` : Prefix for first `catalog.tags.tsv` (generated by Stacks (V1) `cstacks` )
- `PREFIX_B` : Prefix for second `catalog.tags.tsv` (generated by Stacks (V1) `cstacks` )

## Outputs

---

- `matches.txt` : tab-delimited file; rows correspond to a catalog entry; two columns: individual 1 `stack_ID`, individual 2 `stack_ID`
- `catalog.stats.txt` : a text file containing the number of stacks in individual 2 that correspond to any stack in individual 1, and vice versa

# Reformat Genotype File for LepMAP2 (format.stacks.output.for.lepmap.py)

---

Interpreter: Python 2

## Command Line Use

---

```
python format.stacks.output.for.lepmap.py PREFIX
```

## Inputs

---

- `hybrids.haplotypes.tsv` : haplotypes file for parent1 (generated by Stacks (V1) genotypes )
- `PREFIX.genotypes.tsv` : genotypes file for population (generated by Stacks (V1) genotypes )
- `PREFIX.haplotypes.tsv` : haplotypes file for population (generated by Stacks (V1) genotypes )

## Outputs

---

- `PREFIX.lepmap.linkage` : input file for LepMAP2 in LINKAGE format
- `PREFIX.lepmap.markernames.txt` : every line contains the marker name for every marker included in the `PREFIX.lepmap.linkage` file in preserved order
- `PREFIX.perMarkerStats.txt` : for each marker, number of aa, ab, bb, and NA genotypes called; tab-delimited
- `PREFIX.perIndividualStats.txt` : for each individual, number of aa, ab, bb, and NA genotypes called; tab-delimited

# Connect LepMAP2 Markers to Stack IDs (get.marker.positions.py)

---

Interpreter: Python 2

## Command Line Use

---

```
python get.marker.positions.py PREFIX
```

## Inputs

---

- `PREFIX.lepmap.markernames.txt` : marker names for the markers used to generate the map (generated by `format.stacks.output.for.lepmap.py` )
- `PREFIX.lod20.lg*X*.rmdup1.order.txt` : genetic map files - one for each linkage group (generated by LepMAP2)
- `rk.rf.lgs.match.txt` : each line contains information about the correspondence between a linkage group from each backcross population as well as the number of overlapping markers; tab-delimited

## Outputs

---

- `PREFIX.genetic.map.with.stacks.names.csv` : each line corresponds to a marker in the genetic map with 4 elements: stacks\_ID, linkage group, position, LepMAP2 marker name; tab-delimited
- `PREFIX.markers.txt` : every line contains the marker name for every marker included in the `PREFIX.lepmap.linkage` file in preserved order

# Extract Marker Sequences

## (extract.marker.sequences.from.catalog.py)

---

Interpreter: Python 2

## Command Line Use

---

```
python extract.marker.sequences.from.catalog.py PREFIX
```

## Inputs

---

- `batch_0.catalog.tags.tsv` : catalog of markers (generated by Stacks (V1) `cstacks` )
- `PREFIX.genetic.map.with.stacks.names.csv` : each line corresponds to a marker in the genetic map with 4 elements: stacks\_ID, linkage group, position, LepMAP2 marker name; tab-delimited (generated by `get.marker.positions.py` )

## Outputs

---

- `PREFIX.marker.sequences.fasta` : the genomic sequences of the markers in the genetic map in FASTA format

# Get Z-linked *B. mori* Proteins (grab.bombyx.z.proteins.py)

---

Interpreter: Python 3

## Command Line Use

---

```
python grab.bombyx.z.proteins.py
```

## Inputs

---

- `correspondence_table_Bmscaf_nscaf.txt` : AGP file for the *B. mori* genome
- `Bombyx_mori.GCA_000151625.1.32.gff3` : Unpacked GFF annotation file distributed with the *B. mori* genome ([ftp://ftp.ensemblgenomes.org/pub/release-32/metazoa/gff3/bombyx\\_mori/](ftp://ftp.ensemblgenomes.org/pub/release-32/metazoa/gff3/bombyx_mori/))
- `Bombyx_mori.GCA_000151625.1.pep.all.fa` : Unpacked protein database distributed with the *B. mori* genome ([ftp://ftp.ensemblgenomes.org/pub/release-32/metazoa/fasta/bombyx\\_mori/pep/](ftp://ftp.ensemblgenomes.org/pub/release-32/metazoa/fasta/bombyx_mori/pep/))

## Outputs

---

- `bm.zchrom.proteins.fa` : the amino acid sequences for Z chromosome proteins in FASTA format

# Get Z-linked *M. cinxia* Proteins (get.melitaea.protein.IDs.py)

---

Interpreter: Python 3

## Command Line Use

---

```
python get.melitaea.protein.IDs.py
```

## Inputs

---

- `melitaea_scaff_ids.txt` : contains the scaffold IDs associated with the Z chromosome; every scaffold ID is on a separate line
- `Melitaea_cinxia_v1.gff` : GFF annotation file distributed with the *M. cinxia* genome
- `Melitaea_cinxia_proteins_v1.fa` : Protein database distributed with the *M. cinxia* genome

## Outputs

---

- `mc.zchrom.proteins.fa` : the amino acid sequences for Z chromosome proteins in FASTA format
- `mc.zChrom.protein.IDs.txt` : the names of the proteins extracted, one protein name per line
